# Supplementary material
Source: PubMed Central journal article supplement (PMC5650504)
Supplement: NIHMS871793-supplement-Supp_info.pdf [file NIHMS871793-supplement-Supp_info.pdf]

**Supplemental Table 1. Characteristics of Study Population by reliability of MRE data**

| Variable                                             | Excluded<br>(N = 17) | Included<br>(N=90) | P value |
|------------------------------------------------------|----------------------|--------------------|---------|
| Age, mean (SD), y                                    | 12.5 (3.1)           | 13.1 (2.4)         | 0.4873  |
| Sex, N (%)                                           |                      |                    | 0.1459  |
| Boys                                                 | 9 (52.9%)            | 66 (73.3%)         |         |
| Girls                                                | 8 (47.1%)            | 24 (26.6%)         |         |
| Race, N (%)                                          |                      |                    | 0.4277  |
| White                                                | 11 (64.7%)           | 46 (51.1%)         |         |
| Other                                                | 6 (35.3%)            | 44 (48.9%)         |         |
| Ethnicity, N (%)                                     |                      |                    | 0.1955  |
| Hispanic                                             | 14 (82.4%)           | 83 (92.2%)         |         |
| Non-Hispanic                                         | 3 (17.6%)            | 7 (7.8%)           |         |
| Weight, mean (SD), Kg                                | 78.9 (29.8)          | 80.5 (24.0)        | 0.5423  |
| Height, mean (SD), cm                                | 156.0 (14.3)         | 160.4 (12.3)       | 0.2661  |
| BMI (Kg/m <sup>2</sup> ), mean (SD)                  | 31.3 (6.9)           | 30.7 (6.2)         | 0.7884  |
| BMI Z score                                          | 2.3 (0.4)            | 2.1 (0.4)          | 0.1781  |
| ALT, median (range), U/L                             | 83.0 (34 - 675)      | 63.0 (17 - 811)    | 0.0443  |
| AST, median (range), U/L                             | 56.0 (20 - 265)      | 40.0 (16 - 364)    | 0.1250  |
| GGT, median (range), U/L                             | 39 (19 - 224)        | 30.5 (11 - 407)    | 0.0524  |
| Platelet count, median (range), x 10 <sup>9</sup> /L | 277.0 (167 - 477)    | 280.0 (69 - 430)   | 0.9118  |
| Steatosis grade, N (%)                               |                      |                    | 0.3827  |
| Grade 0                                              | 2 (11.8%)            | 4 (4.4%)           |         |
| Grade 1                                              | 3 (17.6%)            | 28 (31.1%)         |         |
| Grade 2                                              | 3 (17.6%)            | 20 (22.2%)         |         |
| Grade 3                                              | 9 (52.9%)            | 38 (42.2%)         |         |
| Lobular Inflammation, N (%)                          |                      |                    | 0.789   |
| Grade 0-1                                            | 6 (35.3%)            | 38 (42.2%)         |         |
| Grade 2-3                                            | 11 (64.7%)           | 52 (57.8%)         |         |
| Portal Inflammation, N (%)                           |                      |                    | 8e-04   |
| Grade 0                                              | 1 (5.9%)             | 42 (46.7%)         |         |
| Grade 1                                              | 13 (76.5%)           | 45 (50.0%)         |         |
| Grade 2                                              | 3 (17.6%)            | 3 (3.3%)           |         |
| Hepatocellular Ballooning, N (%)                     |                      |                    | .1736   |
| Grade 0                                              | 12 (70.6%)           | 46 (51.1%)         |         |
| Grade 1                                              | 3 (17.6%)            | 36 (40.0%)         |         |
| Grade 2                                              | 2 (11.8%)            | 8 (8.9%)           |         |
| NASH diagnosis, N (%)                                |                      |                    | 0.035   |
| None/NAFLD                                           | 3 (17.6%)            | 41 (45.6%)         |         |
| Borderline/Definite NASH                             | 14 (82.4%)           | 49 (54.4%)         |         |
| Fibrosis Stage, N (%)                                |                      |                    | <0.0001 |
| Stages 0-2                                           | 8 (47.1%)            | 84 (93.3%)         |         |
| Stages 3-4                                           | 9 (52.9%)            | 6 (6.7%)           |         |
